# Supplementary material for: Partial homologies between sleep states in lizards, mammals, and birds suggest a complex evolution of sleep states in amniotes
Source: PubMed Central journal article supplement (PMC6181266; doi:10.1371/journal.pbio.2005982), 2018-10-11

# Dorso Ventricular Ridge + Dorsal Cortex

#1

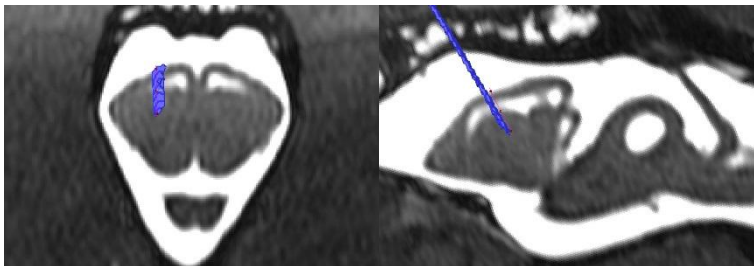

#2

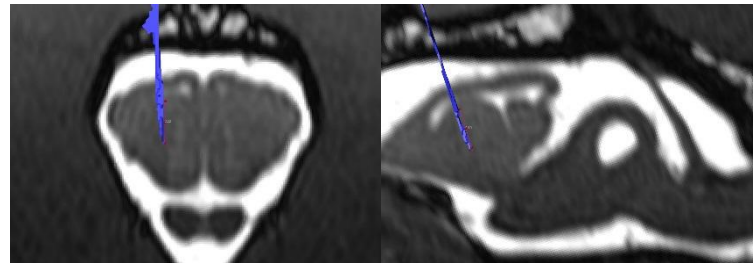

#3

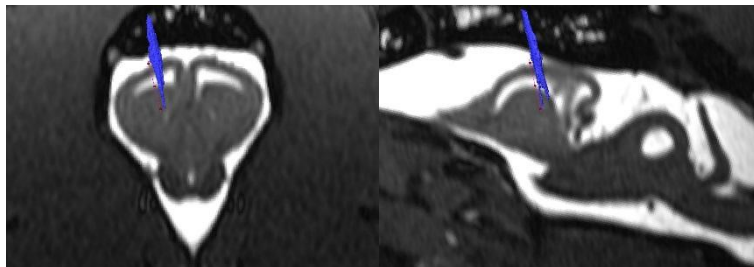

#5

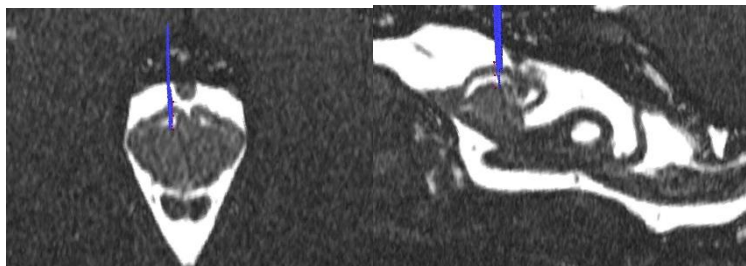

#5

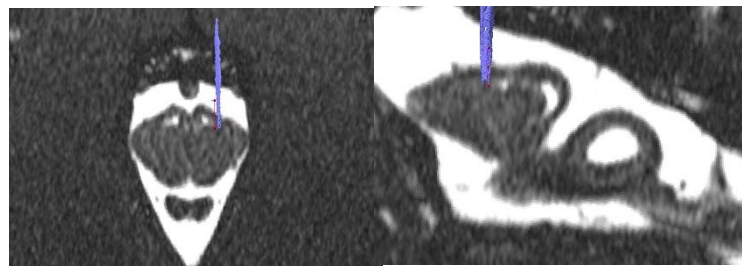

#6

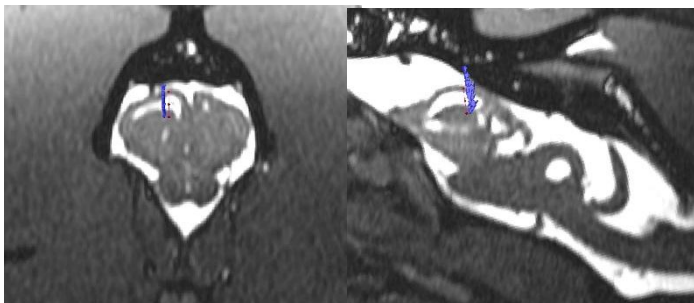

#6

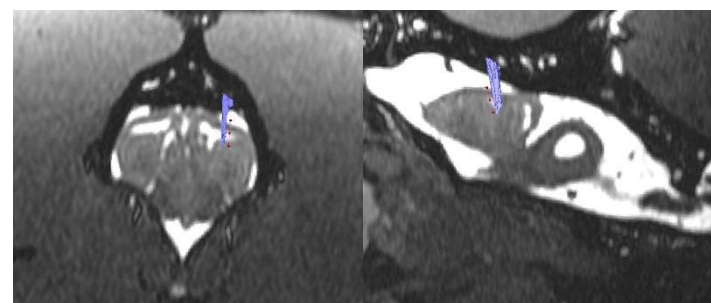

# Medial Cortex

#1

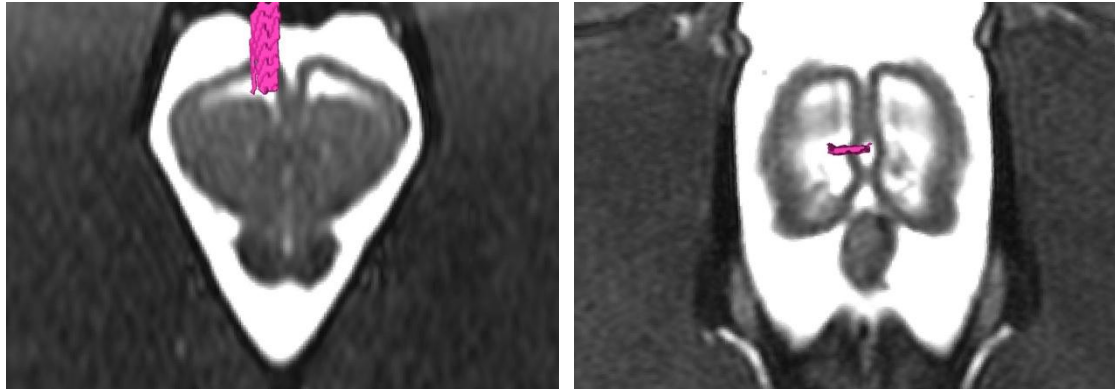

#2

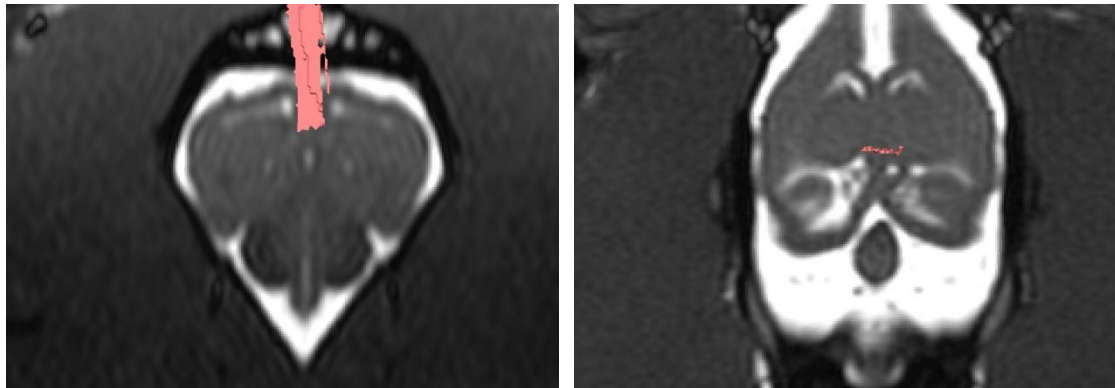

#3

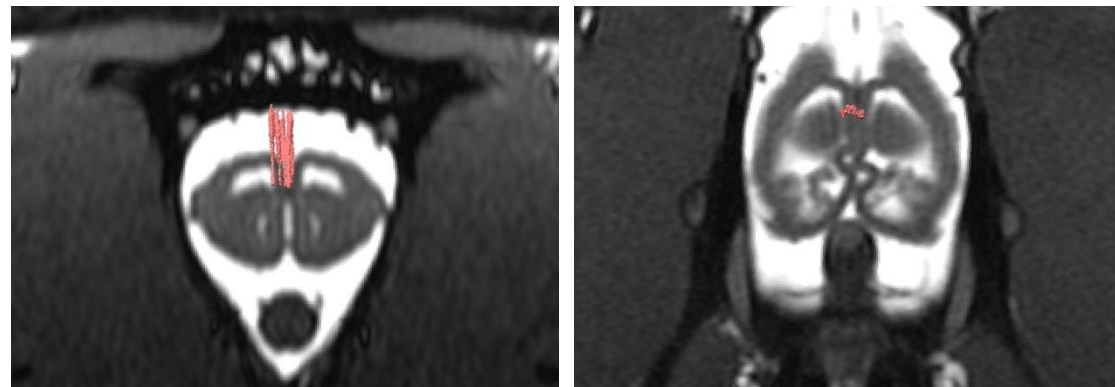

# Nucleus sphericus without Dorsal cortex

#1

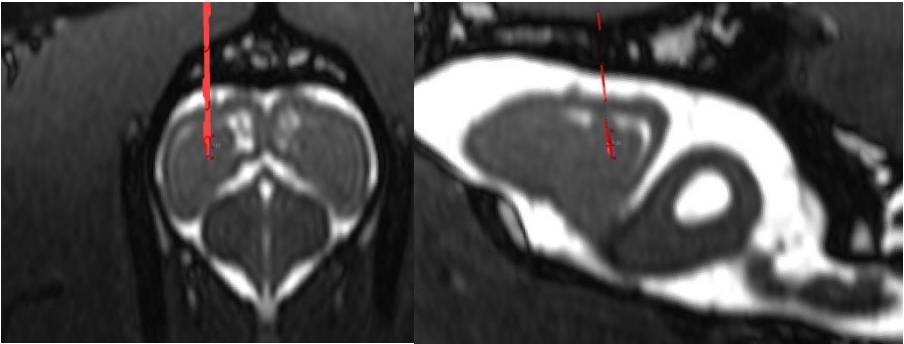

#4

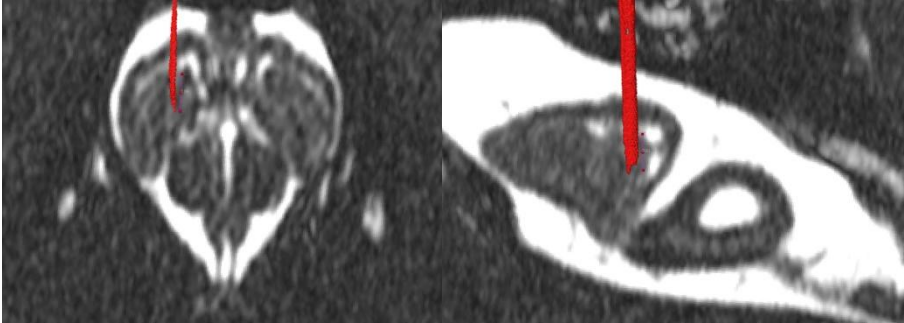

#4

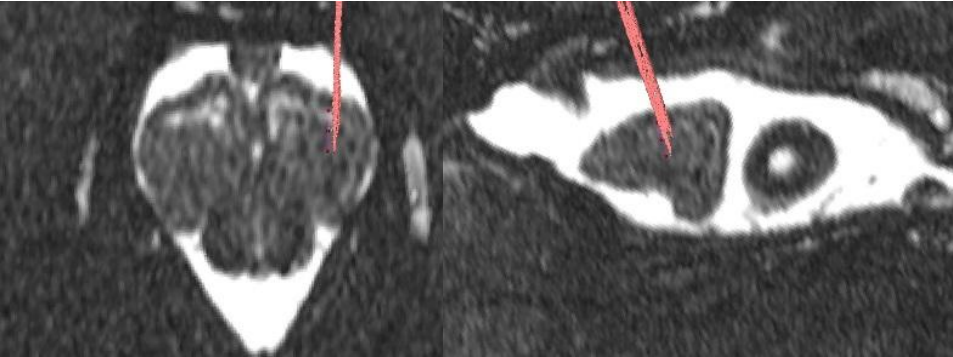

# Nucleus sphericus with Dorsal cortex

#4

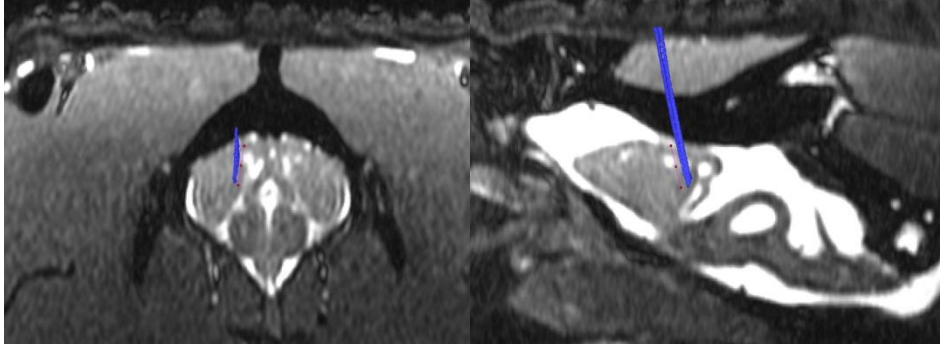

#6

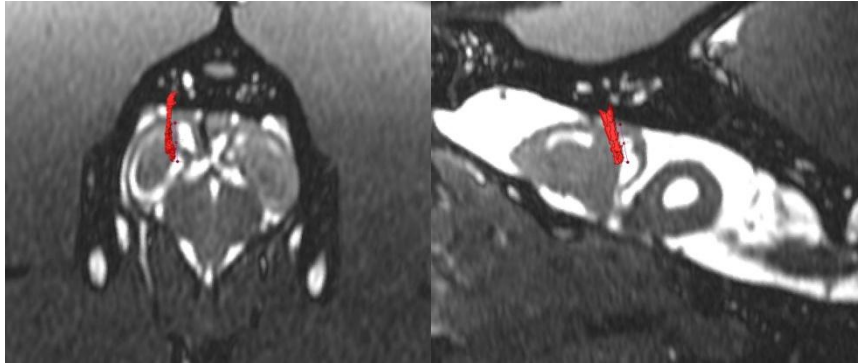

# Caudal Medial Cortex

#1

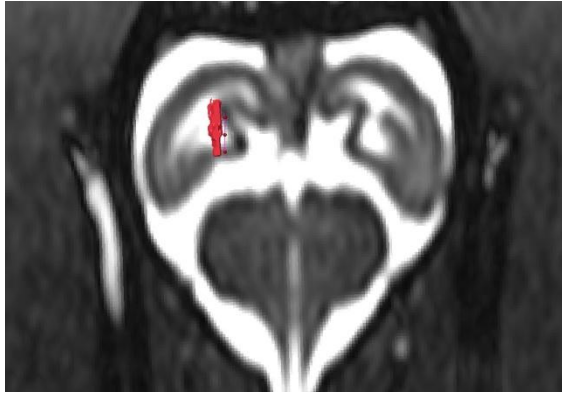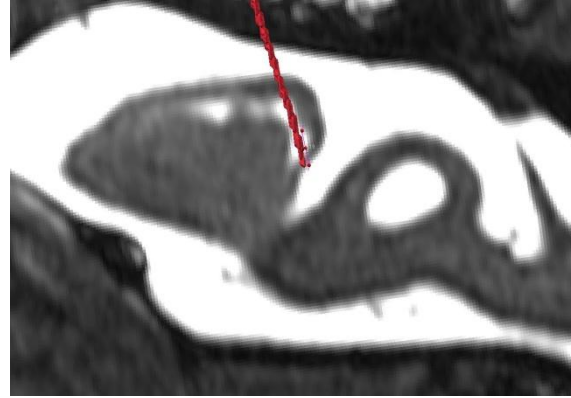

#3

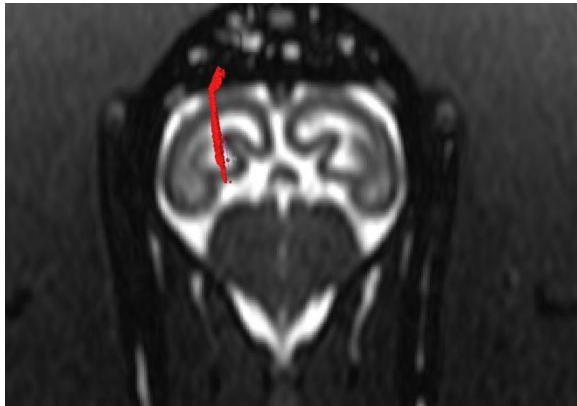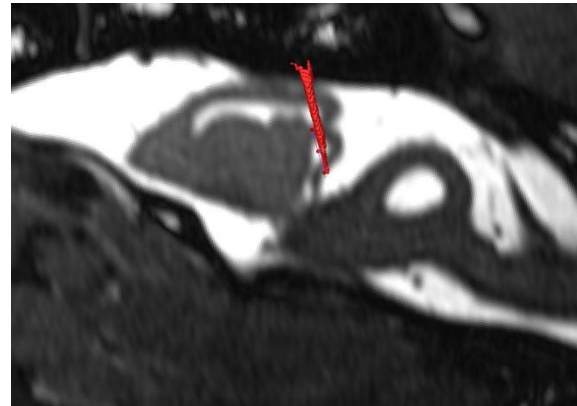

#6

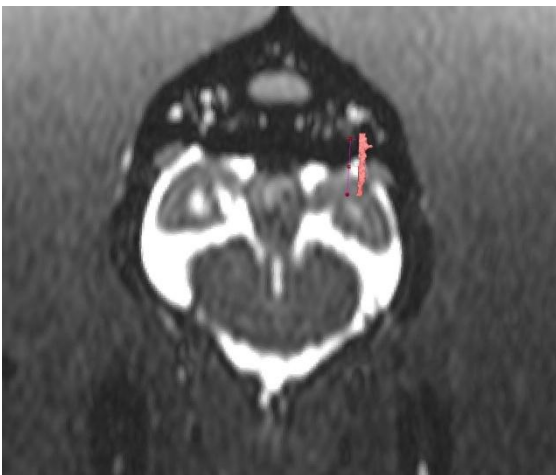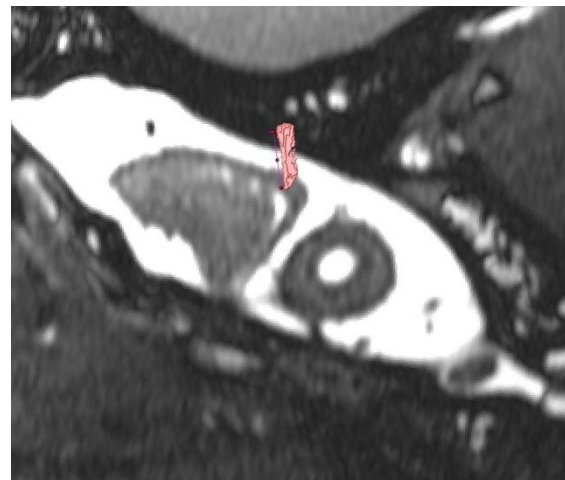

Supplement: pbio.2005982.s002.pdf [file pbio.2005982.s002.pdf]
