# Supplementary material for: Partial homologies between sleep states in lizards, mammals, and birds suggest a complex evolution of sleep states in amniotes
Source: PubMed Central journal article supplement (PMC6181266; doi:10.1371/journal.pbio.2005982), 2018-10-11

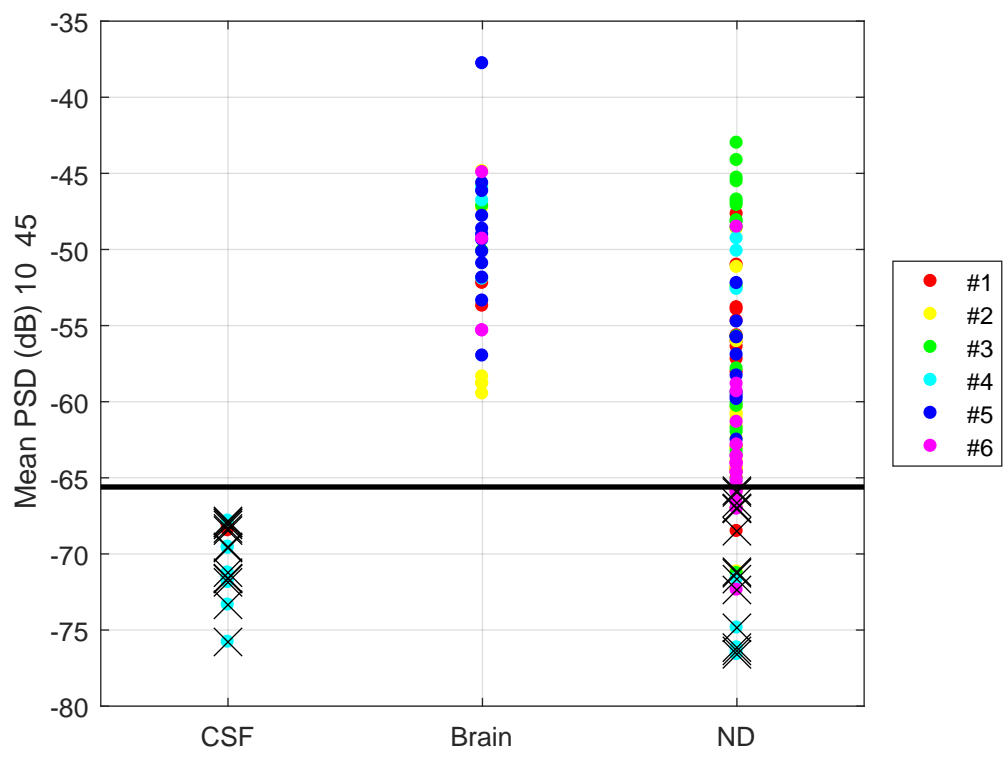

Supplement: pbio.2005982.s003.pdf [file pbio.2005982.s003.pdf]
